# Supplementary material for: Network design for quantifying urban CO 2 emissions: assessing trade-offs between precision and network density
Source: Copernicus journal article supplement (doi:10.5194/acp-16-13465-2016), 2016-11-01
Supplement: Supplementary file 1 [file acp-16-13465-2016-supplement.pdf]

Supplement of Atmos. Chem. Phys., 16, 13465–13475, 2016  
<http://www.atmos-chem-phys.net/16/13465/2016/>  
doi:10.5194/acp-16-13465-2016-supplement  
© Author(s) 2016. CC Attribution 3.0 License.

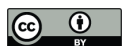

*Supplement of*

## **Network design for quantifying urban CO<sub>2</sub> emissions: assessing trade-offs between precision and network density**

**Alexander J. Turner et al.**

*Correspondence to:* Ronald C. Cohen (rccohen@berkeley.edu)

The copyright of individual parts of the supplement might differ from the CC-BY 3.0 licence.

## Contents

|          |                                                    |           |
|----------|----------------------------------------------------|-----------|
| <b>1</b> | <b>WRF-STILT</b>                                   | <b>2</b>  |
| <b>2</b> | <b>Prior error covariance matrix</b>               | <b>3</b>  |
| <b>3</b> | <b>Regridding emissions</b>                        | <b>7</b>  |
| <b>4</b> | <b>Implementation of the error metrics</b>         | <b>7</b>  |
| 4.1      | Area Source . . . . .                              | 7         |
| 4.2      | Line Source . . . . .                              | 8         |
| 4.3      | Point Source . . . . .                             | 8         |
| <b>5</b> | <b>Relating the error metric to the flux error</b> | <b>8</b>  |
| <b>6</b> | <b>Sensitivity tests</b>                           | <b>8</b>  |
| 6.1      | Sensitivity to domain size . . . . .               | 9         |
| 6.2      | Sensitivity to systematic biases . . . . .         | 9         |
| 6.3      | Sensitivity to observational frequency . . . . .   | 9         |
| <b>7</b> | <b>Model selection criterion</b>                   | <b>12</b> |
| <b>A</b> | <b>Tables of Model Selection Criterion</b>         | <b>15</b> |

## 1 WRF-STILT

We use meteorological fields from the Weather Research and Forecasting (WRF v3.5, [1]) model, a mesoscale meteorological model, to drive the Stochastic Time-Inverted Lagrangian Transport (STILT [2]) model, a Lagrangian particle dispersion model. The coupling between the WRF and STILT models (WRF-STILT) was developed by Nehr Korn *et al.*[3]. Meteorological fields were generated at four gridded horizontal resolutions (27, 9, 3, and 1 km) in a one-way nested arrangement centered around California's Bay Area (see Fig. 1). All WRF domains had 50 vertical levels (see caption of Fig. 1). Initial and lateral boundary conditions were provided by the North American Regional Reanalysis[4]. Overlapping 30-hour forecasts were initialized every 24 hours, at 00 UTC, and the first 6 hours of each forecast were discarded to allow for model spinup. Grid nudging was used in the outer-most domain. WRF simulations used the MYJ planetary boundary layer scheme and the 5-layer SLAB land surface model[1].

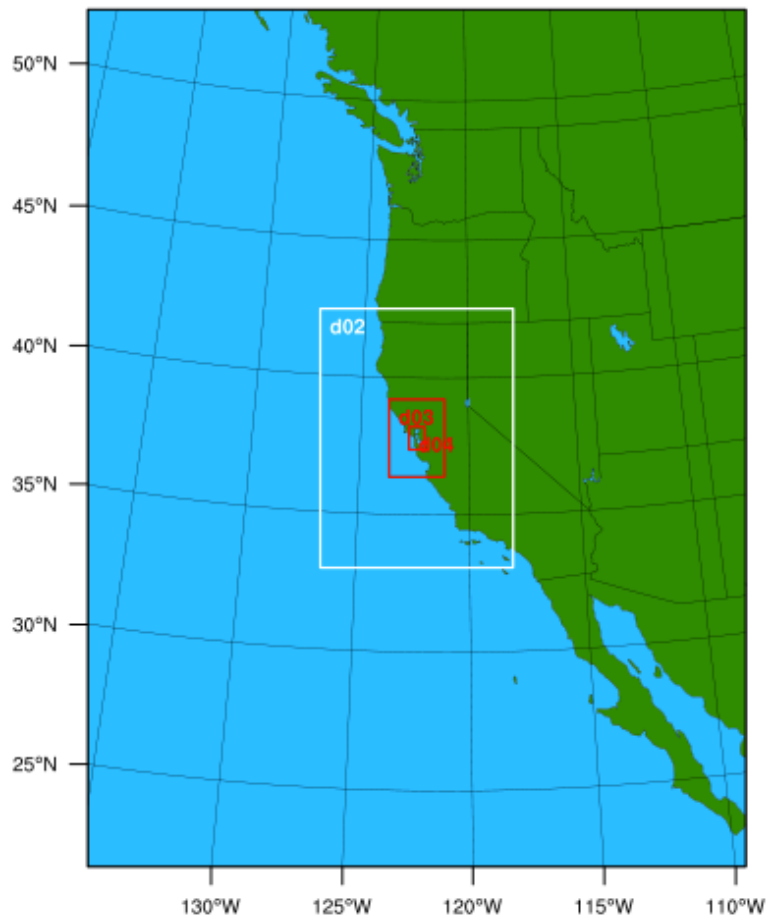

Figure 1: **WRF domains.** Plot window covers the outermost domain (d01), d02 covers the majority of California, d03 covers a section of Northern California, and d04 covers California's Bay Area. Vertical levels: 28, 97, 190, 309, 460, 652, 887, 1110, 1301, 1497, 1697, 1994, 2391, 2791, 3195, 3602, 4013, 4427, 4845, 5266, 5691, 6121, 6554, 6991, 7433, 7879, 8330, 8785, 9246, 9711, 10182, 10657, 11139, 11626, 12119, 12618, 13124, 13636, 14155, 14681, 15215, 15757, 16304, 16853, 17401, 17950, 18498, 19046, 19594, and 20141 m.

The STILT model advects an ensemble of 500 particles 3-days backward in time, each with a small random perturbation, from the spatio-temporal receptor points using the meteorological fields from WRF. Fig. 2 shows some example particle trajectories. These trajectories can be used to construct measurement footprints, representing the sensitivity of the measurement to a perturbation in emissions from a given location (see Fig. 3).

## 2 Prior error covariance matrix

Following Meirink *et al.*[5], Singh *et al.*[6], and Yadav & Michalak[7], we express our prior error covariance matrix ( $\mathbf{B}$ ;  $m \times m$ ) as a Kronecker product of a temporal covariance matrix ( $\mathbf{D}$ ;  $m_t \times m_t$ ) and a spatial covariance matrix ( $\mathbf{E}$ ;  $m_x m_y \times m_x m_y$ ), in our application,  $m = 2, 133, 120$ ,  $m_t = 240$ ,  $m_x = 88$ , and  $m_y = 101$ . This allows us to write  $\mathbf{B}$  as:

$$\mathbf{B} = \mathbf{D} \otimes \mathbf{E} = \begin{pmatrix} d_{(1,1)}\mathbf{E} & \cdots & d_{(1,m_t)}\mathbf{E} \\ \vdots & \ddots & \vdots \\ d_{(m_t,1)}\mathbf{E} & \cdots & d_{(m_t,m_t)}\mathbf{E} \end{pmatrix} \quad (1)$$

where  $\otimes$  is the Kronecker product. Our implementation is adapted from Yadav & Michalak[7].

The temporal and spatial covariance matrices can be expressed in terms of correlation matrices and diagonal variance matrices:

$$\mathbf{\Sigma} = \mathbf{V}^{1/2}\mathbf{M}\mathbf{V}^{1/2} \quad (2)$$

where  $\mathbf{\Sigma}$  is an  $p \times p$  covariance matrix,  $\mathbf{M}$  is an  $p \times p$  correlation matrix, and  $\mathbf{V}$  is an  $p \times p$  diagonal matrix of variances:

$$\mathbf{V} = \begin{pmatrix} \sigma_1^2 & 0 & \cdots & 0 \\ 0 & \sigma_2^2 & \ddots & 0 \\ \vdots & \ddots & \ddots & 0 \\ 0 & \cdots & 0 & \sigma_p^2 \end{pmatrix} \quad (3)$$

Thus, the temporal covariance matrix is  $\mathbf{D} = \mathbf{V}_t^{1/2}\mathbf{M}_t\mathbf{V}_t^{1/2}$  and the spatial covariance matrix is  $\mathbf{E} = \mathbf{V}_s^{1/2}\mathbf{M}_s\mathbf{V}_s^{1/2}$ .

We construct  $\mathbf{V}_t$ ,  $\mathbf{V}_s$ ,  $\mathbf{M}_t$ , and  $\mathbf{M}_s$  from the BEACO<sub>2</sub>N emission inventory described in the main text.  $\mathbf{X}$  is an  $m_x \times m_y \times m_t$  third-order tensor of CO<sub>2</sub> emissions from the BEACO<sub>2</sub>N emission inventory.  $\mathbf{V}_t$  and  $\mathbf{V}_s$  are constructed as:

$$\mathbf{V}_t = f_\sigma \cdot \begin{pmatrix} \text{var}(\mathbf{X}_{(:, :, 1)}) & 0 & \cdots & 0 \\ 0 & \text{var}(\mathbf{X}_{(:, :, 2)}) & \ddots & 0 \\ \vdots & \ddots & \ddots & 0 \\ 0 & \cdots & 0 & \text{var}(\mathbf{X}_{(:, :, m_t)}) \end{pmatrix} \quad (4)$$

$$\mathbf{V}_s = f_\sigma \cdot \begin{pmatrix} \text{var}(\mathbf{X}_{(1, 1, :)}) & 0 & \cdots & 0 \\ 0 & \text{var}(\mathbf{X}_{(1, 2, :)}) & \ddots & 0 \\ \vdots & \ddots & \ddots & 0 \\ 0 & \cdots & 0 & \text{var}(\mathbf{X}_{(m_x, m_y, :)}) \end{pmatrix} \quad (5)$$

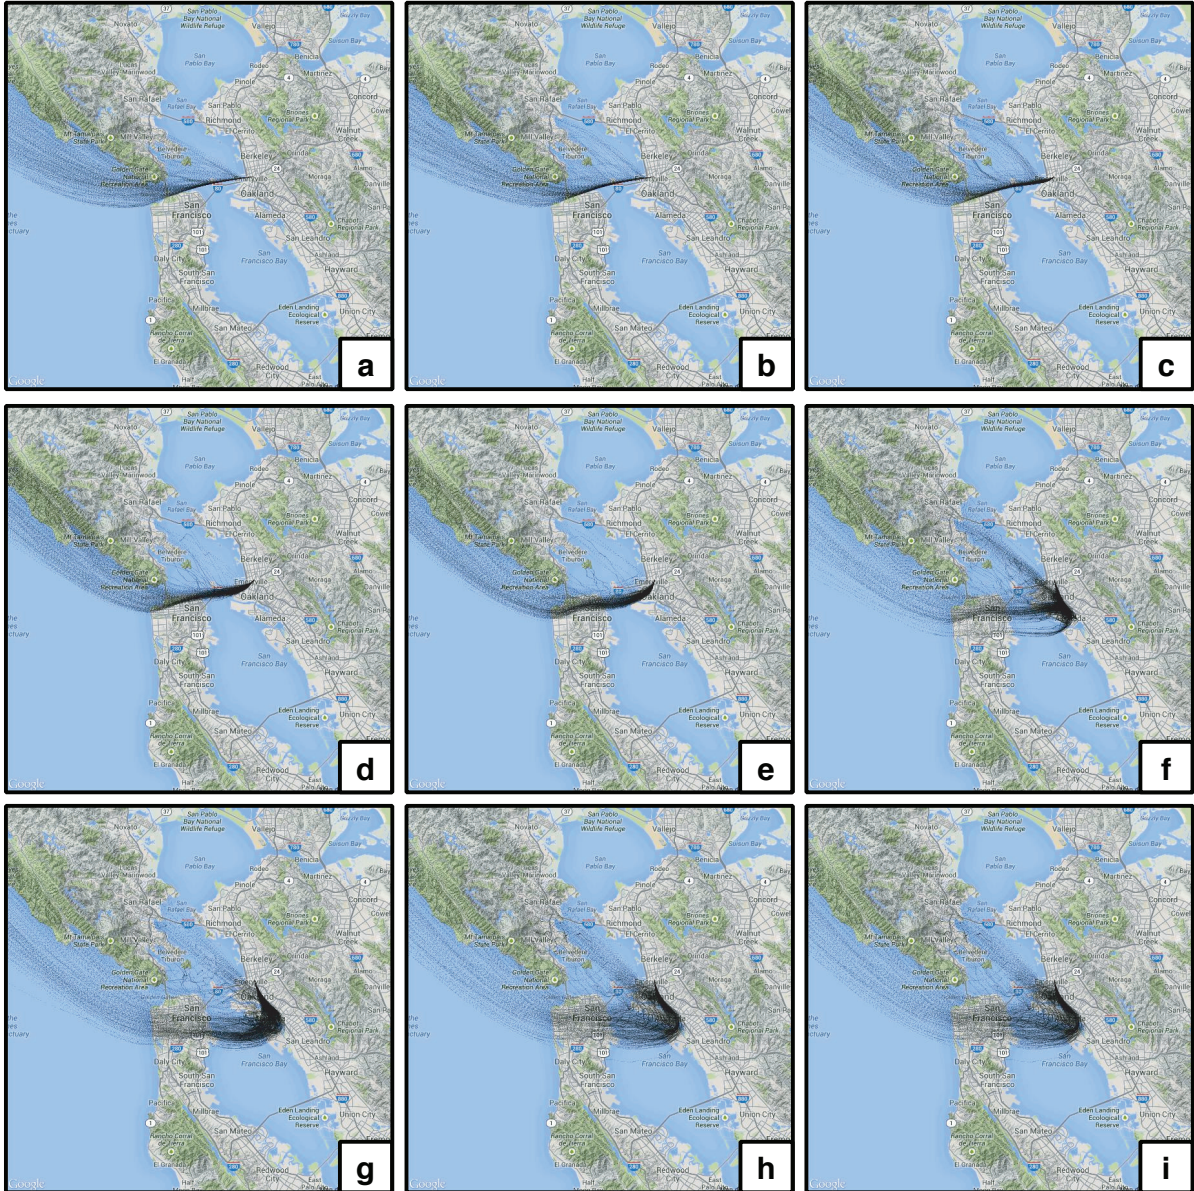

Figure 2: **STILT back trajectories.** Example back trajectories computed using WRF-STILT beginning from a BEACO<sub>2</sub>N node. Panels show different particle release times.

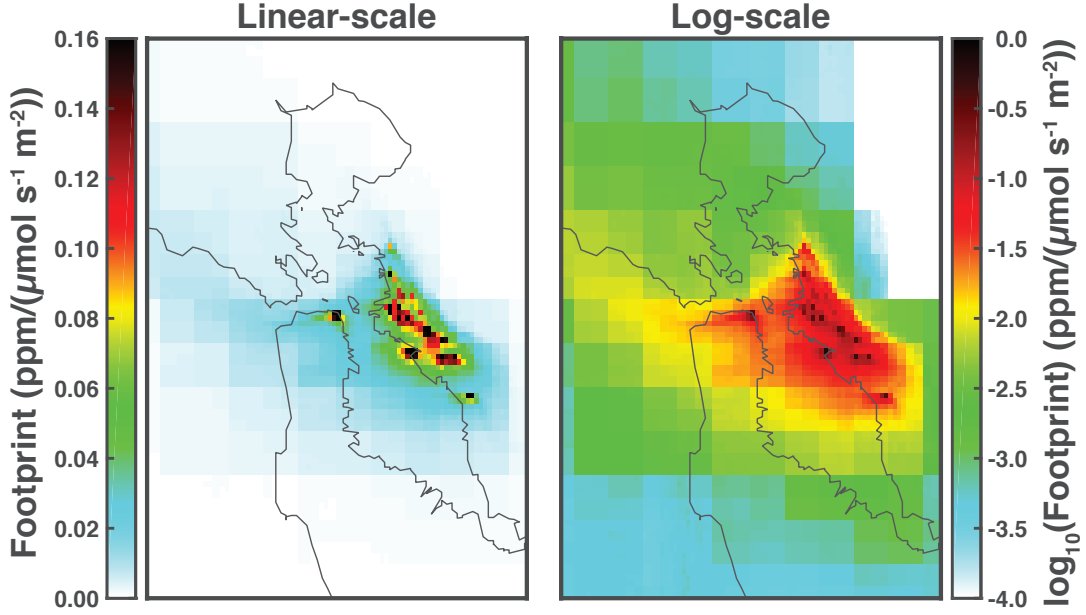

Figure 3: **Footprints**. Left panel is the same as main text Fig. 2. Right panel is on a log-scale.

where  $f_\sigma$  is an uncertainty scaling factor. Here we have chosen  $f_\sigma = 1$ , corresponding to a 100% uncertainty.  $\mathbf{M}_t$  and  $\mathbf{M}_s$  are constructed as:

$$\mathbf{M}_t = \begin{pmatrix} \text{corr}(\mathbf{X}_{(:, :, 1)}, \mathbf{X}_{(:, :, 1)}) & \cdots & \text{corr}(\mathbf{X}_{(:, :, 1)}, \mathbf{X}_{(:, :, m_t)}) \\ \vdots & \ddots & \vdots \\ \text{corr}(\mathbf{X}_{(:, :, m_t)}, \mathbf{X}_{(:, :, 1)}) & \cdots & \text{corr}(\mathbf{X}_{(:, :, m_t)}, \mathbf{X}_{(:, :, m_t)}) \end{pmatrix} \circ \exp\left(-\frac{\mathbf{Z}_t}{\tau_t}\right) \quad (6)$$

$$\mathbf{M}_s = \begin{pmatrix} \text{corr}(\mathbf{X}_{(1, 1, :)}, \mathbf{X}_{(1, 1, :)}) & \cdots & \text{corr}(\mathbf{X}_{(1, 1, :)}, \mathbf{X}_{(m_x, m_y, :)}) \\ \vdots & \ddots & \vdots \\ \text{corr}(\mathbf{X}_{(m_x, m_y, :)}, \mathbf{X}_{(1, 1, :)}) & \cdots & \text{corr}(\mathbf{X}_{(m_x, m_y, :)}, \mathbf{X}_{(m_x, m_y, :)}) \end{pmatrix} \circ \exp\left(-\frac{\mathbf{Z}_s}{\tau_s}\right) \quad (7)$$

where  $\circ$  is the Hadamard product,  $\mathbf{Z}_t$  ( $m_t \times m_t$ ) and  $\mathbf{Z}_s$  ( $m_x m_y \times m_x m_y$ ) represent the separation lags/distances in between locations in time and space, respectively, and  $\tau_t$  and  $\tau_s$  are the temporal and spatial decay parameters, respectively. Here we have chosen  $\tau_t = 3$  hr and  $\tau_s = 5$  km.

The resulting correlation structure can be seen in Fig. 4. We can see that the temporal correlation matrix is diagonal with an exponential decay (Fig. 4c). The spatial structure shown in Fig. 4d and 4e is more complicated. The banded structure in panels Fig. 4d and 4e is from reshaping the state vector from matrices to a vector.

Here we have used knowledge of the true emissions,  $\mathbf{X}$ , in constructing  $\mathbf{M}_t$  and  $\mathbf{M}_s$ . At first glance this would seem to be an overly optimistic specification of the prior covariance structure. However, in practice, this is equivalent to specifying a correlation that exponentially decays over a specified land-type (e.g., roads). This is because grid cells from similar land-types have a similar diurnal cycle and will be strongly correlated with each other and have negligible correlations with other land-types. This can be seen in Fig 4a and 4b. This is similar to the “hybrid” spatial error correlation used in Basu *et al.*[8].

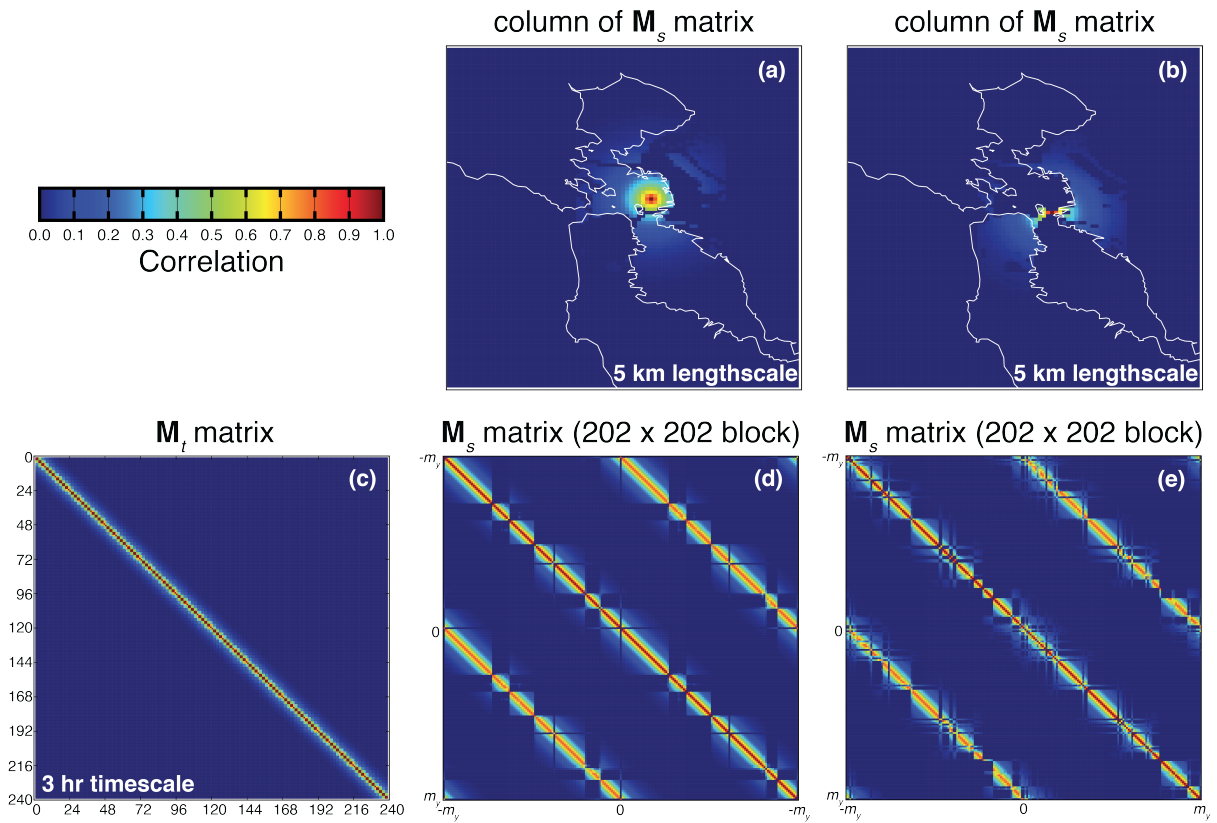

Figure 4: **Prior correlation matrix structure.** (a) A column of the spatial correlation matrix for a grid cell in the bay. (b) A column of the spatial correlation matrix for a grid cell on a road. (c) Temporal correlation matrix. (d) A  $202 \times 202$  block of the spatial correlation matrix centered on the grid cell from panel (a). (e) A  $202 \times 202$  block of the spatial correlation matrix showing some of the more complicated structure.  $m_y$  in panel (d) and (e) is the number of grid cells in the longitudinal direction ( $m_y = 101$ ).

### 3 Regridding emissions

CarbonTracker emissions are provided in units of mol m<sup>-2</sup> s<sup>-1</sup> at a resolution of 1°. To regrid them to 1 km resolution we first compute the surface area of each grid cell in our domain and convert the CarbonTracker emissions to a mass emitted per grid box. We then pull out the region of interest and compute the mass emitted. We then spatially interpolate the emissions from 1° to 1 km resolution and scale the result such that mass in our region of interest is conserved.

### 4 Implementation of the error metrics

For computing the error metric we use three third-order tensors (all dimension  $m_x \times m_y \times m_t$ ): the prior emissions ( $\mathbf{W}$ ), the true emissions ( $\mathbf{X}$ ), and the posterior emissions ( $\mathbf{Y}$ ). And evaluate them using:

$$\eta = 1 - \frac{\|\mathbf{y} - \mathbf{x}\|_2}{\|\mathbf{w} - \mathbf{x}\|_2} \quad (8)$$

where  $\mathbf{x}$ ,  $\mathbf{y}$ , and  $\mathbf{w}$  are explained for each source type below.

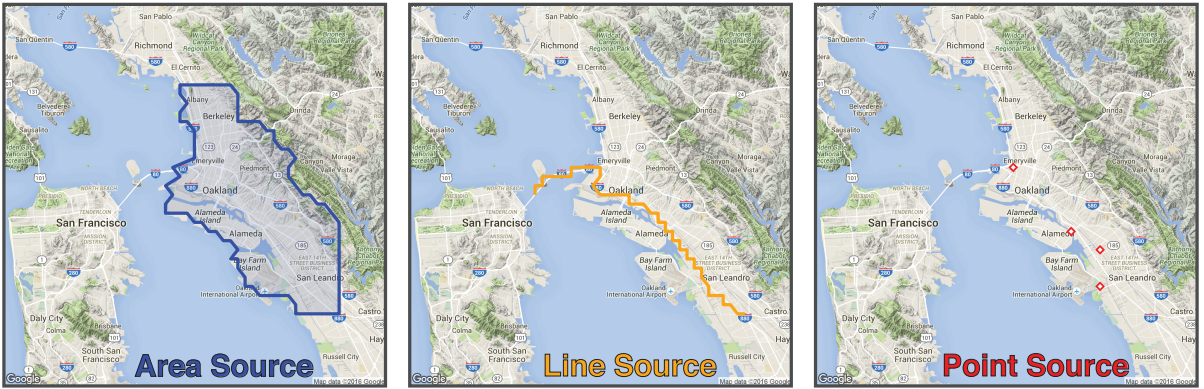

Figure 5: **Source types examined.** Same as right column from main text Fig. 4. The area source, line source, and point source have emission rates of  $147 \pm 55$  tC hr<sup>-1</sup>,  $45 \pm 20$  tC hr<sup>-1</sup>, and  $9 \pm 4$  tC hr<sup>-1</sup> over one week, respectively.

#### 4.1 Area Source

We use the area source mask ( $\mathcal{M}_{AS}$ ) shown in the left panel of Fig. 5. We sum emissions from within the mask at each timestep to create  $m_t \times 1$  vectors of emissions from the area source.  $\mathbf{x}$ ,  $\mathbf{y}$ , and  $\mathbf{w}$  are constructed as:

$$\mathbf{x} = \begin{pmatrix} \sum_{i,j \in \mathcal{M}_{AS}} \mathbf{X}(i,j,1) \\ \sum_{i,j \in \mathcal{M}_{AS}} \mathbf{X}(i,j,2) \\ \vdots \\ \sum_{i,j \in \mathcal{M}_{AS}} \mathbf{X}(i,j,m_t) \end{pmatrix}, \quad \mathbf{y} = \begin{pmatrix} \sum_{i,j \in \mathcal{M}_{AS}} \mathbf{Y}(i,j,1) \\ \sum_{i,j \in \mathcal{M}_{AS}} \mathbf{Y}(i,j,2) \\ \vdots \\ \sum_{i,j \in \mathcal{M}_{AS}} \mathbf{Y}(i,j,m_t) \end{pmatrix}, \quad \mathbf{w} = \begin{pmatrix} \sum_{i,j \in \mathcal{M}_{AS}} \mathbf{W}(i,j,1) \\ \sum_{i,j \in \mathcal{M}_{AS}} \mathbf{W}(i,j,2) \\ \vdots \\ \sum_{i,j \in \mathcal{M}_{AS}} \mathbf{W}(i,j,m_t) \end{pmatrix} \quad (9)$$

Posterior emissions are then evaluated using Eq. 8.



## 4.2 Line Source

We use the line source mask ( $\mathcal{M}_{\text{LS}}$ ) shown in the middle panel of Fig. 5. We sum emissions from within the mask at each timestep to create  $m_t \times 1$  vectors of emissions from the line source.  $\mathbf{x}$ ,  $\mathbf{y}$ , and  $\mathbf{w}$  are constructed as:

$$\mathbf{x} = \begin{pmatrix} \sum_{i,j \in \mathcal{M}_{\text{LS}}} \mathbf{X}(i,j,1) \\ \sum_{i,j \in \mathcal{M}_{\text{LS}}} \mathbf{X}(i,j,2) \\ \vdots \\ \sum_{i,j \in \mathcal{M}_{\text{LS}}} \mathbf{X}(i,j,m_t) \end{pmatrix}, \quad \mathbf{y} = \begin{pmatrix} \sum_{i,j \in \mathcal{M}_{\text{LS}}} \mathbf{Y}(i,j,1) \\ \sum_{i,j \in \mathcal{M}_{\text{LS}}} \mathbf{Y}(i,j,2) \\ \vdots \\ \sum_{i,j \in \mathcal{M}_{\text{LS}}} \mathbf{Y}(i,j,m_t) \end{pmatrix}, \quad \mathbf{w} = \begin{pmatrix} \sum_{i,j \in \mathcal{M}_{\text{LS}}} \mathbf{W}(i,j,1) \\ \sum_{i,j \in \mathcal{M}_{\text{LS}}} \mathbf{W}(i,j,2) \\ \vdots \\ \sum_{i,j \in \mathcal{M}_{\text{LS}}} \mathbf{W}(i,j,m_t) \end{pmatrix} \quad (10)$$

Posterior emissions are then evaluated using Eq. 8.

## 4.3 Point Source

We use the locations of the four point sources ( $[i^{\{1\}}, \dots, i^{\{4\}}]$  and  $[j^{\{1\}}, \dots, j^{\{4\}}]$ ) shown in the right panel of Fig. 5. We extract emissions from the four point sources at each timestep to create  $4m_t \times 1$  vectors of emissions from the point sources.  $\mathbf{x}$ ,  $\mathbf{y}$ , and  $\mathbf{w}$  are constructed as:

$$\mathbf{x} = \begin{pmatrix} \mathbf{X}_{(i^{\{1\}}, j^{\{1\}}, 1)} \\ \mathbf{X}_{(i^{\{2\}}, j^{\{2\}}, 1)} \\ \mathbf{X}_{(i^{\{3\}}, j^{\{3\}}, 1)} \\ \mathbf{X}_{(i^{\{4\}}, j^{\{4\}}, 1)} \\ \vdots \\ \mathbf{X}_{(i^{\{1\}}, j^{\{1\}}, m_t)} \\ \mathbf{X}_{(i^{\{2\}}, j^{\{2\}}, m_t)} \\ \mathbf{X}_{(i^{\{3\}}, j^{\{3\}}, m_t)} \\ \mathbf{X}_{(i^{\{4\}}, j^{\{4\}}, m_t)} \end{pmatrix}, \quad \mathbf{y} = \begin{pmatrix} \mathbf{Y}_{(i^{\{1\}}, j^{\{1\}}, 1)} \\ \mathbf{Y}_{(i^{\{2\}}, j^{\{2\}}, 1)} \\ \mathbf{Y}_{(i^{\{3\}}, j^{\{3\}}, 1)} \\ \mathbf{Y}_{(i^{\{4\}}, j^{\{4\}}, 1)} \\ \vdots \\ \mathbf{Y}_{(i^{\{1\}}, j^{\{1\}}, m_t)} \\ \mathbf{Y}_{(i^{\{2\}}, j^{\{2\}}, m_t)} \\ \mathbf{Y}_{(i^{\{3\}}, j^{\{3\}}, m_t)} \\ \mathbf{Y}_{(i^{\{4\}}, j^{\{4\}}, m_t)} \end{pmatrix}, \quad \mathbf{w} = \begin{pmatrix} \mathbf{W}_{(i^{\{1\}}, j^{\{1\}}, 1)} \\ \mathbf{W}_{(i^{\{2\}}, j^{\{2\}}, 1)} \\ \mathbf{W}_{(i^{\{3\}}, j^{\{3\}}, 1)} \\ \mathbf{W}_{(i^{\{4\}}, j^{\{4\}}, 1)} \\ \vdots \\ \mathbf{W}_{(i^{\{1\}}, j^{\{1\}}, m_t)} \\ \mathbf{W}_{(i^{\{2\}}, j^{\{2\}}, m_t)} \\ \mathbf{W}_{(i^{\{3\}}, j^{\{3\}}, m_t)} \\ \mathbf{W}_{(i^{\{4\}}, j^{\{4\}}, m_t)} \end{pmatrix} \quad (11)$$

Posterior emissions are then evaluated using Eq. 8.

## 5 Relating the error metric to the flux error

We can relate our error metric ( $\eta$ ) to the flux error as:

$$\varepsilon = \underbrace{(1 - \eta)}_{\text{unexplained error}} \cdot \underbrace{\left( \frac{1}{m} \sum_{i=1}^m \mathbf{x}_i^* \right)}_{\text{mean true emissions}} \cdot \underbrace{\left( \frac{1}{m} \sum_{i=1}^m \left| \frac{\mathbf{x}_i^p - \mathbf{x}_i^*}{\mathbf{x}_i^*} \right| \right)}_{\text{mean relative difference between prior and true emissions}} \quad (12)$$

where  $\mathbf{x}^*$  is the true emissions,  $\mathbf{x}^p$  ( $m \times 1$  vector) is the prior emissions, and  $m = 2, 133, 120$ .

## 6 Sensitivity tests

We tested the sensitivity to domain-size, systematic biases, and observational frequency.

### 6.1 Sensitivity to domain size

The inversion was found to be fairly insensitive to domain size. This was determined by comparing the base case inversion to an inversion using a reduced domain (gray box in Fig. 6). Fig. 7 shows the error for the reduced domain and the difference between the base case. We find roughly 1% less error reduction when using the reduced domain, compared to the base case.

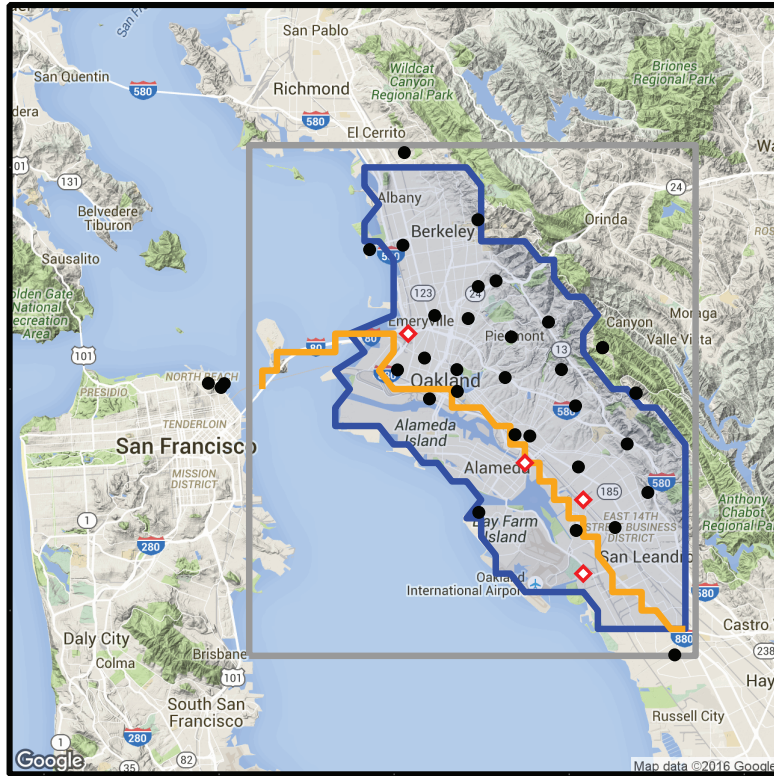

Figure 6: **Map of sites with reduced domain.** Same as top panel from main text Fig. 2 except the reduced domain is also shown as a gray box.

### 6.2 Sensitivity to systematic biases

We performed an ensemble of inversions where each measurement site had a systematic bias ( $\epsilon_b$ ) added to it. The bias for each site ( $\epsilon_b$ ) was drawn from a zero-mean gaussian with a standard deviation  $\sigma_b = 1$  ppm:  $\epsilon_b \sim \mathcal{N}(0, \sigma_b^2)$ .

Fig. 8 shows the error for an inversion where we have introduced a systematic bias ( $\epsilon_b \sim \mathcal{N}(0, \sigma_b^2)$ ) at each site.

### 6.3 Sensitivity to observational frequency

The inversion was found to be sensitive to the observational frequency. This was determined by comparing the base case inversion to an inversion using only daytime observations when we might expect a well developed boundary layer (10am to 5pm local time). Fig. 9 shows the error for the daytime-only inversions and the difference between the base case.

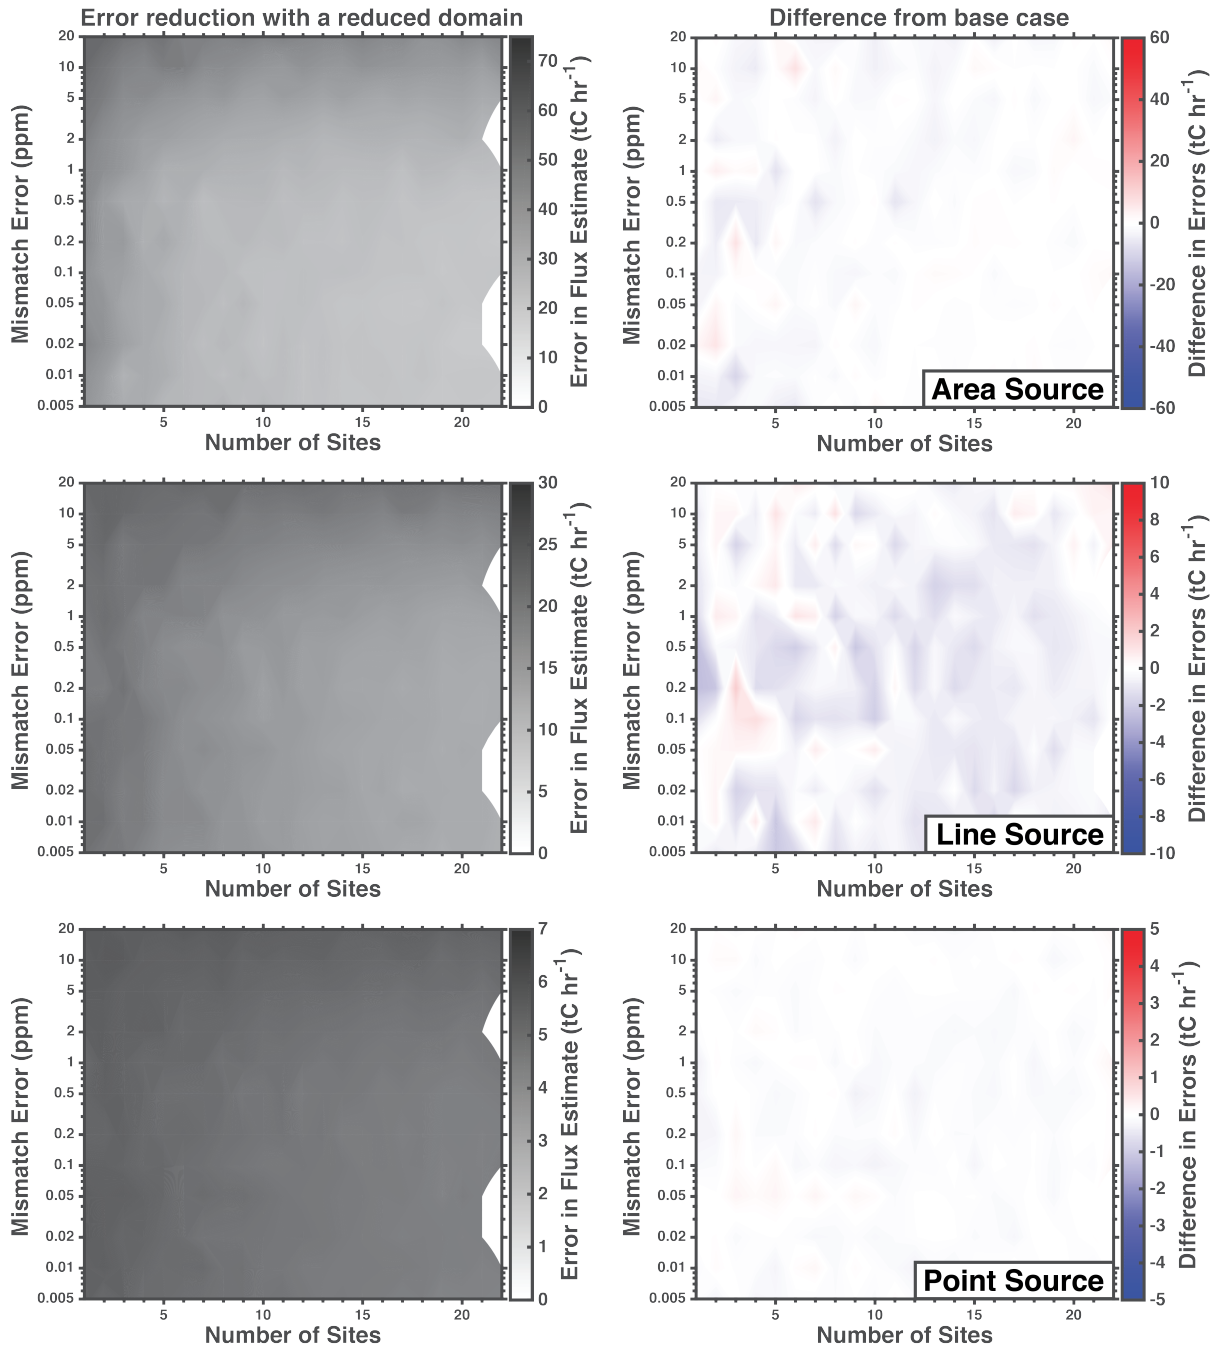

Figure 7: **Error reduction with a reduced domain.** Left column is the same as main text Fig. 4 except the inversions use the reduced domain shown in Fig. 6 and each point only uses 5 ensemble members. Right column is the difference between the left column and the base case.

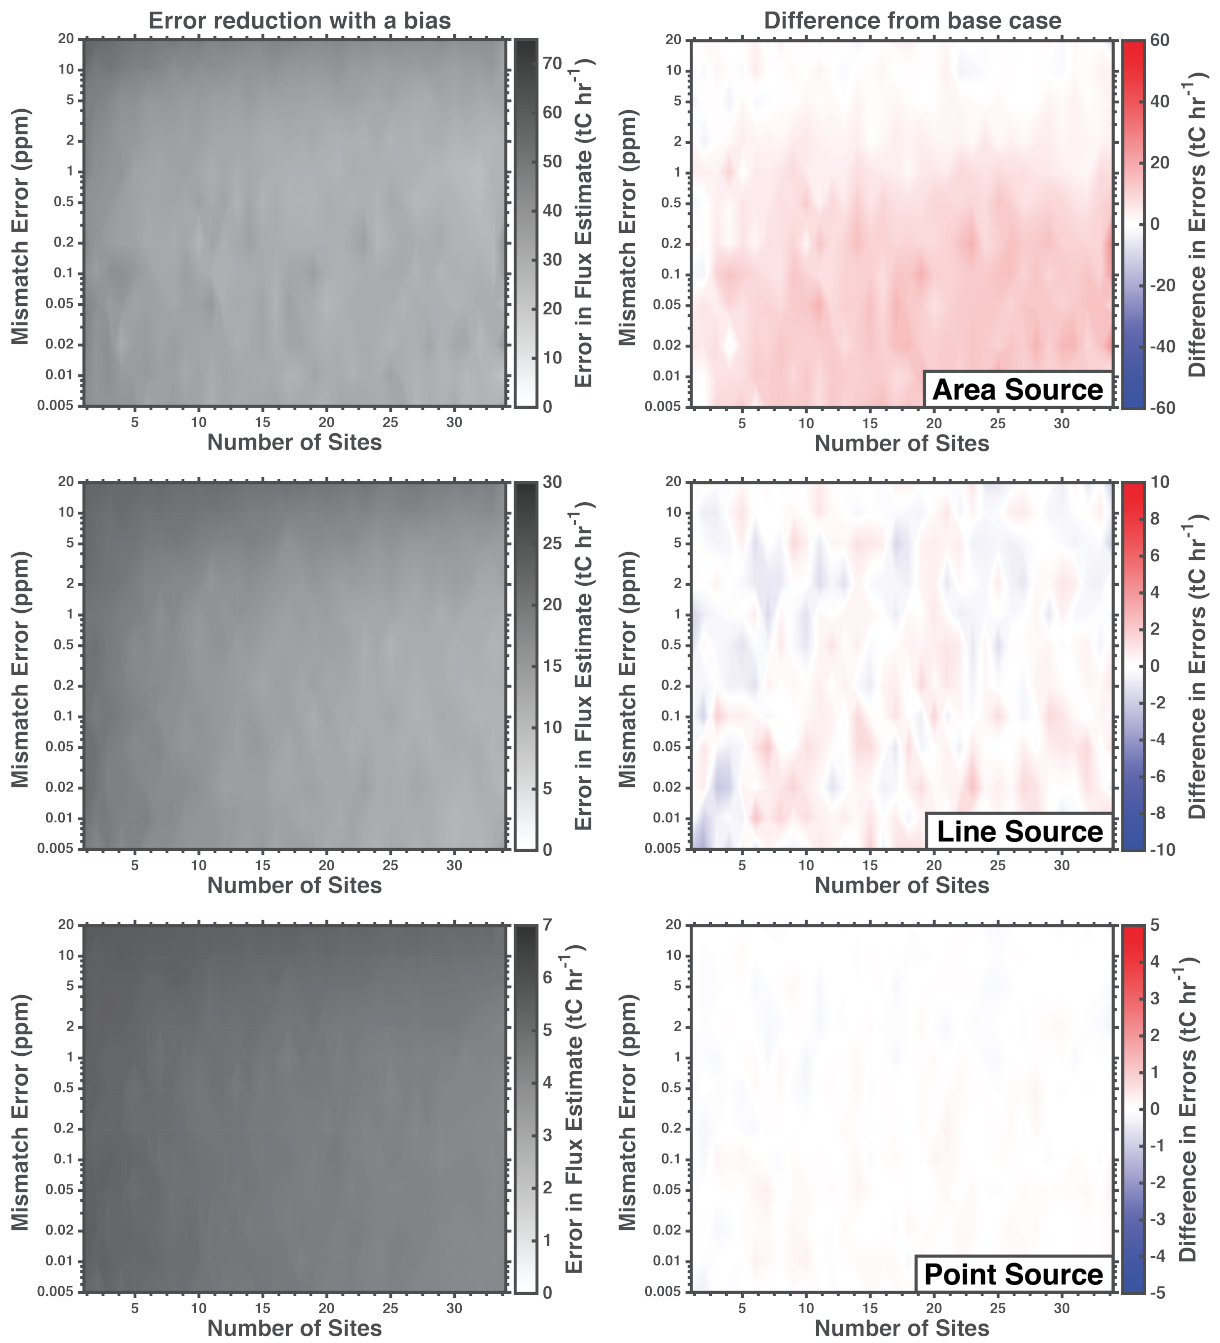

Figure 8: **Error reduction with a systematic bias.** Same as Fig. 7 but for a systematic bias ( $\epsilon_b \sim \mathcal{N}(0, \sigma_b^2)$ ) at each site.

This is partly due to the poor representation of the diurnal cycle in the prior emissions. The inversion is unable to correct for the overestimated nighttime emissions in the prior without nighttime observations.

## 7 Model selection criterion

The statistical models presented in the main text were chosen based on an analysis of 127 different models using Akaike Information Criterion (AIC), Bayesian Information Criterion (BIC), and F-tests. See Appendix A for a list of all 127 models. The selected models all have p-values less than 0.001 in the F-tests. Table 1 shows the model selection criterion for the reduced domain size and Appendix A lists of all the model selection criterion.

Table 1: Model selection criterion and regression coefficients for the base case.

| Source Type  | AIC | BIC | Model parameters<br>[Regression Coefficients]                                                                                                                        |
|--------------|-----|-----|----------------------------------------------------------------------------------------------------------------------------------------------------------------------|
| Area Source  | 382 | 406 | $\beta_0 + \beta_2\sigma_o + \beta_3 \ln(n_s) + \beta_4 \ln(\sigma_o) + \beta_5\sqrt{n_s} + \beta_6\sqrt{\sigma_o}$<br>[44.16, 0.070, 15.76, 1.23, -3.61, -14.09]    |
| Line Source  | 478 | 502 | $\beta_1 n_s + \beta_2\sigma_o + \beta_3 \ln(n_s) + \beta_4 \ln(\sigma_o) + \beta_5\sqrt{n_s} + \beta_6\sqrt{\sigma_o}$<br>[-1.44, 0.58, -7.57, 1.18, 23.49, -12.37] |
| Point Source | 513 | 533 | $\beta_0 + \beta_2\sigma_o + \beta_4 \ln(\sigma_o) + \beta_5\sqrt{n_s} + \beta_6\sqrt{\sigma_o}$<br>[6.53, 0.77, 0.81, 4.77, -8.95]                                  |

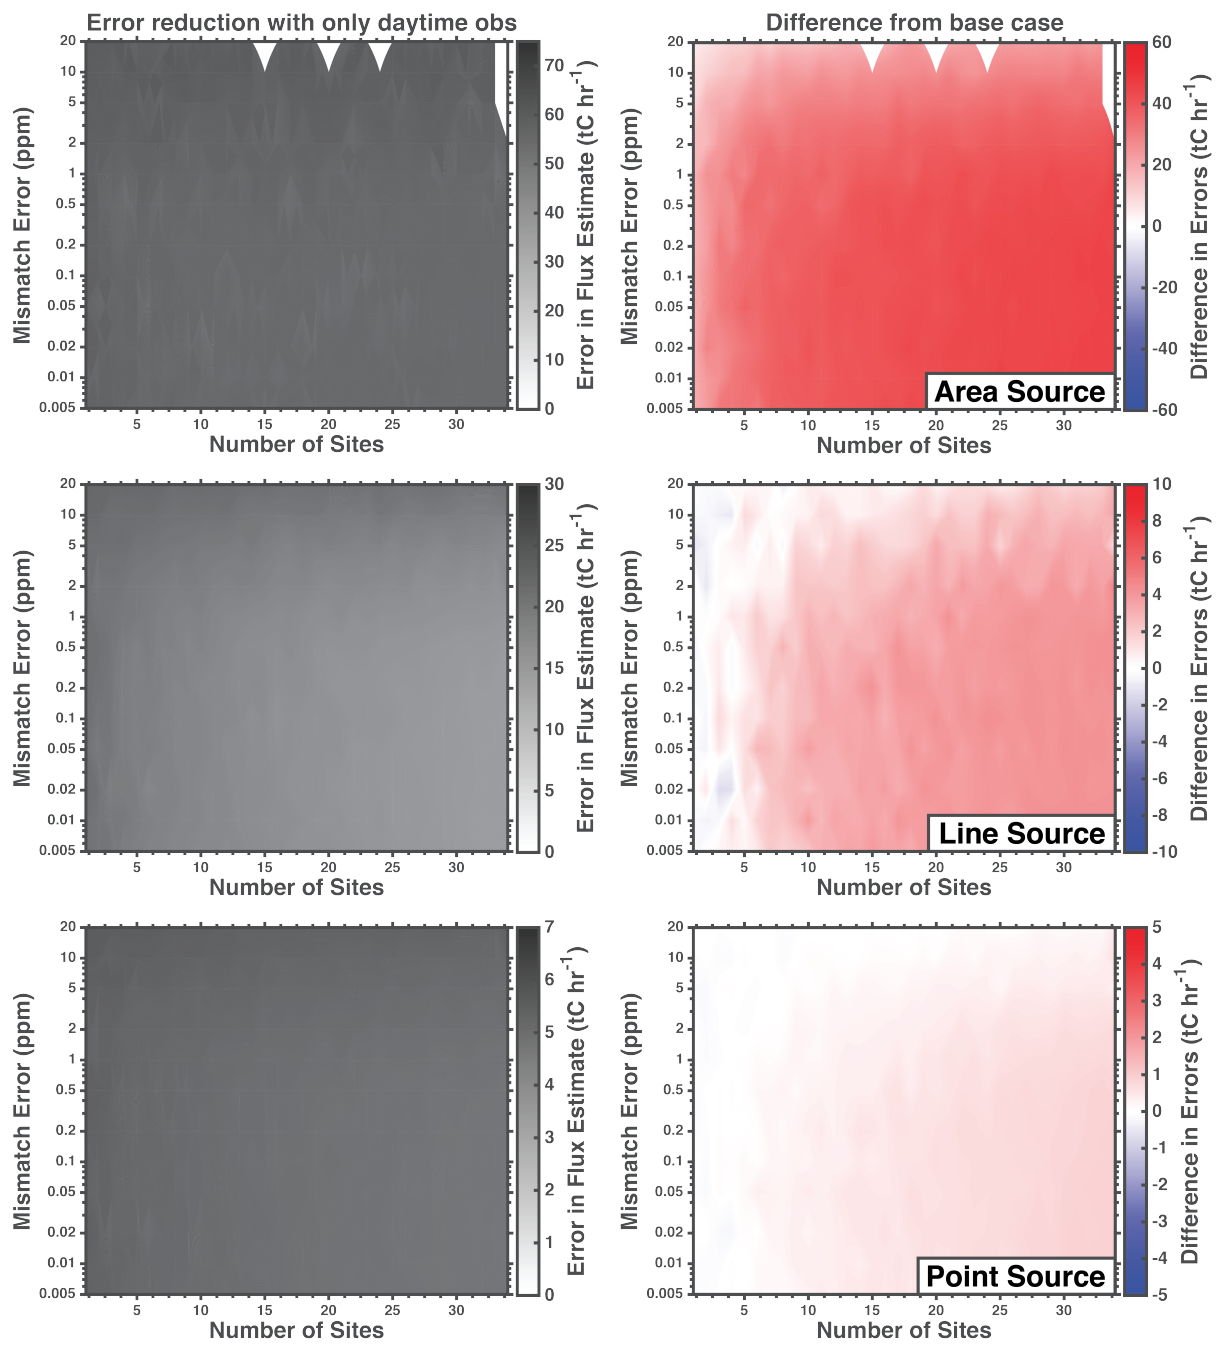

Figure 9: **Error reduction using daytime-only observations.** Same as Fig. 7 but using only daytime observations (10am to 5pm local time).

## References

- [1] Skamarock, W. C. *et al.* A description of the advanced research wrf version 3. Tech. Rep., National Center for Atmospheric Research (2008).
- [2] Lin, J. C. *et al.* A near-field tool for simulating the upstream influence of atmospheric observations: The stochastic time-inverted lagrangian transport (stilt) model. *Journal of Geophysical Research-Atmospheres* **108**, ACH 2–1–ACH 2–17 (2003).
- [3] Nehr Korn, T. *et al.* Coupled weather research and forecasting stochastic time-inverted lagrangian transport (wrf–stilt) model. *Meteorology and Atmospheric Physics* **107**, 51–64 (2010).
- [4] Mesinger, F. *et al.* North american regional reanalysis. *Bulletin of the American Meteorological Society* **87**, 343–360 (2006).
- [5] Meirink, J. F., Bergamaschi, P. & Krol, M. C. Four-dimensional variational data assimilation for inverse modelling of atmospheric methane emissions: method and comparison with synthesis inversion. *Atmospheric Chemistry and Physics* **8**, 6341–6353 (2008).
- [6] Singh, K. *et al.* Construction of non-diagonal background error covariance matrices for global chemical data assimilation. *Geoscientific Model Development* **4**, 299–316 (2011).
- [7] Yadav, V. & Michalak, A. M. Improving computational efficiency in large linear inverse problems: an example from carbon dioxide flux estimation. *Geoscientific Model Development* **6**, 583–590 (2013).
- [8] Basu, S., Miller, J. B. & Lehman, S. Separation of biospheric and fossil fuel fluxes of co<sub>2</sub> by atmospheric inversion of co<sub>2</sub> and <sup>14</sup>co<sub>2</sub> measurements: Observation system simulations. *Atmospheric Chemistry and Physics Discussions* 1–34 (2016).

## A Tables of Model Selection Criterion

Listing 1 : List of all the model combinations

|          |                                                                                      |
|----------|--------------------------------------------------------------------------------------|
| Model 1  | = constant , nSites , obsErr , ln(nSites) , ln(obsErr) , sqrt(nSites) , sqrt(obsErr) |
| Model 2  | = constant , nSites , obsErr , ln(nSites) , ln(obsErr) , sqrt(nSites)                |
| Model 3  | = constant , nSites , obsErr , ln(nSites) , ln(obsErr) , sqrt(obsErr)                |
| Model 4  | = constant , nSites , obsErr , ln(nSites) , sqrt(nSites) , sqrt(obsErr)              |
| Model 5  | = constant , nSites , obsErr , ln(obsErr) , sqrt(nSites) , sqrt(obsErr)              |
| Model 6  | = constant , nSites , ln(nSites) , ln(obsErr) , sqrt(nSites) , sqrt(obsErr)          |
| Model 7  | = constant , obsErr , ln(nSites) , ln(obsErr) , sqrt(nSites) , sqrt(obsErr)          |
| Model 8  | = nSites , obsErr , ln(nSites) , ln(obsErr) , sqrt(nSites) , sqrt(obsErr)            |
| Model 9  | = constant , nSites , obsErr , ln(nSites) , ln(obsErr)                               |
| Model 10 | = constant , nSites , obsErr , ln(nSites) , sqrt(nSites)                             |
| Model 11 | = constant , nSites , obsErr , ln(obsErr) , sqrt(nSites)                             |
| Model 12 | = constant , nSites , ln(nSites) , ln(obsErr) , sqrt(nSites)                         |
| Model 13 | = constant , obsErr , ln(nSites) , ln(obsErr) , sqrt(nSites)                         |
| Model 14 | = nSites , obsErr , ln(nSites) , ln(obsErr) , sqrt(nSites)                           |
| Model 15 | = constant , nSites , obsErr , ln(nSites) , sqrt(obsErr)                             |
| Model 16 | = constant , nSites , obsErr , ln(obsErr) , sqrt(obsErr)                             |
| Model 17 | = constant , nSites , ln(nSites) , ln(obsErr) , sqrt(obsErr)                         |
| Model 18 | = constant , obsErr , ln(nSites) , ln(obsErr) , sqrt(obsErr)                         |
| Model 19 | = nSites , obsErr , ln(nSites) , ln(obsErr) , sqrt(obsErr)                           |
| Model 20 | = constant , nSites , obsErr , sqrt(nSites) , sqrt(obsErr)                           |
| Model 21 | = constant , nSites , ln(nSites) , sqrt(nSites) , sqrt(obsErr)                       |
| Model 22 | = constant , obsErr , ln(nSites) , sqrt(nSites) , sqrt(obsErr)                       |
| Model 23 | = nSites , obsErr , ln(nSites) , sqrt(nSites) , sqrt(obsErr)                         |
| Model 24 | = constant , nSites , ln(obsErr) , sqrt(nSites) , sqrt(obsErr)                       |
| Model 25 | = constant , obsErr , ln(obsErr) , sqrt(nSites) , sqrt(obsErr)                       |
| Model 26 | = nSites , obsErr , ln(obsErr) , sqrt(nSites) , sqrt(obsErr)                         |
| Model 27 | = constant , ln(nSites) , ln(obsErr) , sqrt(nSites) , sqrt(obsErr)                   |
| Model 28 | = nSites , ln(nSites) , ln(obsErr) , sqrt(nSites) , sqrt(obsErr)                     |
| Model 29 | = obsErr , ln(nSites) , ln(obsErr) , sqrt(nSites) , sqrt(obsErr)                     |
| Model 30 | = constant , nSites , obsErr , ln(nSites)                                            |
| Model 31 | = constant , nSites , obsErr , ln(obsErr)                                            |
| Model 32 | = constant , nSites , obsErr , sqrt(nSites)                                          |
| Model 33 | = constant , nSites , obsErr , sqrt(obsErr)                                          |
| Model 34 | = constant , nSites , ln(nSites) , ln(obsErr)                                        |
| Model 35 | = constant , nSites , ln(nSites) , sqrt(nSites)                                      |
| Model 36 | = constant , nSites , ln(nSites) , sqrt(obsErr)                                      |
| Model 37 | = constant , nSites , ln(obsErr) , sqrt(nSites)                                      |
| Model 38 | = constant , nSites , ln(obsErr) , sqrt(obsErr)                                      |
| Model 39 | = constant , nSites , sqrt(nSites) , sqrt(obsErr)                                    |
| Model 40 | = constant , obsErr , ln(nSites) , ln(obsErr)                                        |
| Model 41 | = constant , obsErr , ln(nSites) , sqrt(nSites)                                      |
| Model 42 | = constant , obsErr , ln(nSites) , sqrt(obsErr)                                      |
| Model 43 | = constant , obsErr , ln(obsErr) , sqrt(nSites)                                      |
| Model 44 | = constant , obsErr , ln(obsErr) , sqrt(obsErr)                                      |
| Model 45 | = constant , obsErr , sqrt(nSites) , sqrt(obsErr)                                    |
| Model 46 | = constant , ln(nSites) , ln(obsErr) , sqrt(nSites)                                  |
| Model 47 | = constant , ln(nSites) , ln(obsErr) , sqrt(obsErr)                                  |
| Model 48 | = constant , ln(nSites) , sqrt(nSites) , sqrt(obsErr)                                |
| Model 49 | = constant , ln(obsErr) , sqrt(nSites) , sqrt(obsErr)                                |
| Model 50 | = nSites , obsErr , ln(nSites) , ln(obsErr)                                          |
| Model 51 | = nSites , obsErr , ln(nSites) , sqrt(nSites)                                        |



```
Model 52 = nSites , obsErr , ln(nSites) , sqrt(obsErr)
Model 53 = nSites , obsErr , ln(obsErr) , sqrt(nSites)
Model 54 = nSites , obsErr , ln(obsErr) , sqrt(obsErr)
Model 55 = nSites , obsErr , sqrt(nSites) , sqrt(obsErr)
Model 56 = nSites , ln(nSites) , ln(obsErr) , sqrt(nSites)
Model 57 = nSites , ln(nSites) , ln(obsErr) , sqrt(obsErr)
Model 58 = nSites , ln(nSites) , sqrt(nSites) , sqrt(obsErr)
Model 59 = nSites , ln(obsErr) , sqrt(nSites) , sqrt(obsErr)
Model 60 = obsErr , ln(nSites) , ln(obsErr) , sqrt(nSites)
Model 61 = obsErr , ln(nSites) , ln(obsErr) , sqrt(obsErr)
Model 62 = obsErr , ln(nSites) , sqrt(nSites) , sqrt(obsErr)
Model 63 = obsErr , ln(obsErr) , sqrt(nSites) , sqrt(obsErr)
Model 64 = ln(nSites) , ln(obsErr) , sqrt(nSites) , sqrt(obsErr)
Model 65 = constant , nSites , obsErr
Model 66 = constant , nSites , ln(nSites)
Model 67 = constant , nSites , ln(obsErr)
Model 68 = constant , nSites , sqrt(nSites)
Model 69 = constant , nSites , sqrt(obsErr)
Model 70 = constant , obsErr , ln(nSites)
Model 71 = constant , obsErr , ln(obsErr)
Model 72 = constant , obsErr , sqrt(nSites)
Model 73 = constant , obsErr , sqrt(obsErr)
Model 74 = constant , ln(nSites) , ln(obsErr)
Model 75 = constant , ln(nSites) , sqrt(nSites)
Model 76 = constant , ln(nSites) , sqrt(obsErr)
Model 77 = constant , ln(obsErr) , sqrt(nSites)
Model 78 = constant , ln(obsErr) , sqrt(obsErr)
Model 79 = constant , sqrt(nSites) , sqrt(obsErr)
Model 80 = nSites , obsErr , ln(nSites)
Model 81 = nSites , obsErr , ln(obsErr)
Model 82 = nSites , obsErr , sqrt(nSites)
Model 83 = nSites , obsErr , sqrt(obsErr)
Model 84 = nSites , ln(nSites) , ln(obsErr)
Model 85 = nSites , ln(nSites) , sqrt(nSites)
Model 86 = nSites , ln(nSites) , sqrt(obsErr)
Model 87 = nSites , ln(obsErr) , sqrt(nSites)
Model 88 = nSites , ln(obsErr) , sqrt(obsErr)
Model 89 = nSites , sqrt(nSites) , sqrt(obsErr)
Model 90 = obsErr , ln(nSites) , ln(obsErr)
Model 91 = obsErr , ln(nSites) , sqrt(nSites)
Model 92 = obsErr , ln(nSites) , sqrt(obsErr)
Model 93 = obsErr , ln(obsErr) , sqrt(nSites)
Model 94 = obsErr , ln(obsErr) , sqrt(obsErr)
Model 95 = obsErr , sqrt(nSites) , sqrt(obsErr)
Model 96 = ln(nSites) , ln(obsErr) , sqrt(nSites)
Model 97 = ln(nSites) , ln(obsErr) , sqrt(obsErr)
Model 98 = ln(nSites) , sqrt(nSites) , sqrt(obsErr)
Model 99 = ln(obsErr) , sqrt(nSites) , sqrt(obsErr)
Model 100 = constant , nSites
Model 101 = constant , obsErr
Model 102 = constant , ln(nSites)
Model 103 = constant , ln(obsErr)
Model 104 = constant , sqrt(nSites)
Model 105 = constant , sqrt(obsErr)
Model 106 = nSites , obsErr
Model 107 = nSites , ln(nSites)
Model 108 = nSites , ln(obsErr)
```

```

Model 109 = nSites ,sqrt(nSites)
Model 110 = nSites ,sqrt(obsErr)
Model 111 = obsErr ,ln(nSites)
Model 112 = obsErr ,ln(obsErr)
Model 113 = obsErr ,sqrt(nSites)
Model 114 = obsErr ,sqrt(obsErr)
Model 115 = ln(nSites) ,ln(obsErr)
Model 116 = ln(nSites) ,sqrt(nSites)
Model 117 = ln(nSites) ,sqrt(obsErr)
Model 118 = ln(obsErr) ,sqrt(nSites)
Model 119 = ln(obsErr) ,sqrt(obsErr)
Model 120 = sqrt(nSites) ,sqrt(obsErr)
Model 121 = constant
Model 122 = nSites
Model 123 = obsErr
Model 124 = ln(nSites)
Model 125 = ln(obsErr)
Model 126 = sqrt(nSites)
Model 127 = sqrt(obsErr)

```

Listing 2 : Statistical models for the “Area Source” (base case)

```

*** ERROR REDUCTION MODELS ***
Model 001:  AIC = 383.9276 & BIC = 412.0065 (7 Terms)
Model 002:  AIC = 514.7889 & BIC = 538.8565 (6 Terms)
Model 003:  AIC = 383.7930 & BIC = 407.8606 (6 Terms)
Model 004:  AIC = 451.4532 & BIC = 475.5208 (6 Terms)
Model 005:  AIC = 401.4659 & BIC = 425.5335 (6 Terms)
Model 006:  AIC = 400.9189 & BIC = 424.9865 (6 Terms)
Model 007:  AIC = 382.2329 & BIC = 406.3005 (6 Terms)
Model 008:  AIC = 493.3063 & BIC = 517.3739 (6 Terms)
Model 009:  AIC = 512.9857 & BIC = 533.0420 (5 Terms)
Model 010:  AIC = 543.3056 & BIC = 563.3619 (5 Terms)
Model 011:  AIC = 516.3437 & BIC = 536.4000 (5 Terms)
Model 012:  AIC = 653.1694 & BIC = 673.2258 (5 Terms)
Model 013:  AIC = 512.8003 & BIC = 532.8566 (5 Terms)
Model 014:  AIC = 536.6576 & BIC = 556.7139 (5 Terms)
Model 015:  AIC = 449.8015 & BIC = 469.8579 (5 Terms)
Model 016:  AIC = 512.0753 & BIC = 532.1316 (5 Terms)
Model 017:  AIC = 400.1892 & BIC = 420.2455 (5 Terms)
Model 018:  AIC = 414.4421 & BIC = 434.4984 (5 Terms)
Model 019:  AIC = 575.3743 & BIC = 595.4307 (5 Terms)
Model 020:  AIC = 456.9411 & BIC = 476.9974 (5 Terms)
Model 021:  AIC = 463.3456 & BIC = 483.4019 (5 Terms)
Model 022:  AIC = 449.4542 & BIC = 469.5105 (5 Terms)
Model 023:  AIC = 502.8071 & BIC = 522.8634 (5 Terms)
Model 024:  AIC = 413.9400 & BIC = 433.9964 (5 Terms)
Model 025:  AIC = 477.7444 & BIC = 497.8007 (5 Terms)
Model 026:  AIC = 518.5051 & BIC = 538.5615 (5 Terms)
Model 027:  AIC = 399.1028 & BIC = 419.1591 (5 Terms)
Model 028:  AIC = 492.3375 & BIC = 512.3938 (5 Terms)
Model 029:  AIC = 609.3252 & BIC = 629.3815 (5 Terms)
Model 030:  AIC = 541.7619 & BIC = 557.8069 (4 Terms)
Model 031:  AIC = 557.9078 & BIC = 573.9529 (4 Terms)
Model 032:  AIC = 544.5256 & BIC = 560.5707 (4 Terms)
Model 033:  AIC = 530.8044 & BIC = 546.8495 (4 Terms)

```

|            |                |                  |           |
|------------|----------------|------------------|-----------|
| Model 034: | AIC = 651.2413 | & BIC = 667.2864 | (4 Terms) |
| Model 035: | AIC = 702.6344 | & BIC = 718.6795 | (4 Terms) |
| Model 036: | AIC = 461.5619 | & BIC = 477.6070 | (4 Terms) |
| Model 037: | AIC = 652.3123 | & BIC = 668.3574 | (4 Terms) |
| Model 038: | AIC = 512.9356 | & BIC = 528.9807 | (4 Terms) |
| Model 039: | AIC = 467.6673 | & BIC = 483.7124 | (4 Terms) |
| Model 040: | AIC = 517.6744 | & BIC = 533.7194 | (4 Terms) |
| Model 041: | AIC = 541.5262 | & BIC = 557.5713 | (4 Terms) |
| Model 042: | AIC = 465.0317 | & BIC = 481.0767 | (4 Terms) |
| Model 043: | AIC = 540.2055 | & BIC = 556.2506 | (4 Terms) |
| Model 044: | AIC = 620.0587 | & BIC = 636.1038 | (4 Terms) |
| Model 045: | AIC = 504.8572 | & BIC = 520.9023 | (4 Terms) |
| Model 046: | AIC = 651.1698 | & BIC = 667.2149 | (4 Terms) |
| Model 047: | AIC = 423.5506 | & BIC = 439.5957 | (4 Terms) |
| Model 048: | AIC = 461.3564 | & BIC = 477.4015 | (4 Terms) |
| Model 049: | AIC = 480.3013 | & BIC = 496.3464 | (4 Terms) |
| Model 050: | AIC = 579.0750 | & BIC = 595.1201 | (4 Terms) |
| Model 051: | AIC = 563.5195 | & BIC = 579.5646 | (4 Terms) |
| Model 052: | AIC = 573.5099 | & BIC = 589.5549 | (4 Terms) |
| Model 053: | AIC = 543.5969 | & BIC = 559.6420 | (4 Terms) |
| Model 054: | AIC = 773.1389 | & BIC = 789.1839 | (4 Terms) |
| Model 055: | AIC = 520.0060 | & BIC = 536.0511 | (4 Terms) |
| Model 056: | AIC = 653.3265 | & BIC = 669.3716 | (4 Terms) |
| Model 057: | AIC = 575.0046 | & BIC = 591.0497 | (4 Terms) |
| Model 058: | AIC = 507.2983 | & BIC = 523.3434 | (4 Terms) |
| Model 059: | AIC = 516.5122 | & BIC = 532.5573 | (4 Terms) |
| Model 060: | AIC = 607.6063 | & BIC = 623.6514 | (4 Terms) |
| Model 061: | AIC = 671.7812 | & BIC = 687.8262 | (4 Terms) |
| Model 062: | AIC = 610.4250 | & BIC = 626.4701 | (4 Terms) |
| Model 063: | AIC = 719.4930 | & BIC = 735.5381 | (4 Terms) |
| Model 064: | AIC = 612.5545 | & BIC = 628.5996 | (4 Terms) |
| Model 065: | AIC = 571.4328 | & BIC = 583.4666 | (3 Terms) |
| Model 066: | AIC = 701.1087 | & BIC = 713.1425 | (3 Terms) |
| Model 067: | AIC = 666.7837 | & BIC = 678.8175 | (3 Terms) |
| Model 068: | AIC = 702.2077 | & BIC = 714.2415 | (3 Terms) |
| Model 069: | AIC = 537.8523 | & BIC = 549.8861 | (3 Terms) |
| Model 070: | AIC = 542.2674 | & BIC = 554.3012 | (3 Terms) |
| Model 071: | AIC = 636.6359 | & BIC = 648.6697 | (3 Terms) |
| Model 072: | AIC = 557.6561 | & BIC = 569.6899 | (3 Terms) |
| Model 073: | AIC = 623.5771 | & BIC = 635.6109 | (3 Terms) |
| Model 074: | AIC = 653.0281 | & BIC = 665.0619 | (3 Terms) |
| Model 075: | AIC = 700.9487 | & BIC = 712.9825 | (3 Terms) |
| Model 076: | AIC = 477.6762 | & BIC = 489.7100 | (3 Terms) |
| Model 077: | AIC = 660.6026 | & BIC = 672.6364 | (3 Terms) |
| Model 078: | AIC = 619.4667 | & BIC = 631.5005 | (3 Terms) |
| Model 079: | AIC = 514.0512 | & BIC = 526.0850 | (3 Terms) |
| Model 080: | AIC = 600.1499 | & BIC = 612.1837 | (3 Terms) |
| Model 081: | AIC = 849.7446 | & BIC = 861.7784 | (3 Terms) |
| Model 082: | AIC = 570.1771 | & BIC = 582.2109 | (3 Terms) |
| Model 083: | AIC = 856.8198 | & BIC = 868.8536 | (3 Terms) |
| Model 084: | AIC = 656.1247 | & BIC = 668.1585 | (3 Terms) |
| Model 085: | AIC = 703.3695 | & BIC = 715.4033 | (3 Terms) |
| Model 086: | AIC = 573.8958 | & BIC = 585.9296 | (3 Terms) |
| Model 087: | AIC = 651.3495 | & BIC = 663.3833 | (3 Terms) |
| Model 088: | AIC = 835.8096 | & BIC = 847.8434 | (3 Terms) |
| Model 089: | AIC = 522.5167 | & BIC = 534.5505 | (3 Terms) |
| Model 090: | AIC = 680.5031 | & BIC = 692.5369 | (3 Terms) |

```

Model 091:  AIC = 624.3632 & BIC = 636.3970 (3 Terms)
Model 092:  AIC = 688.4205 & BIC = 700.4543 (3 Terms)
Model 093:  AIC = 747.4873 & BIC = 759.5211 (3 Terms)
Model 094:  AIC = 821.8353 & BIC = 833.8691 (3 Terms)
Model 095:  AIC = 754.1316 & BIC = 766.1654 (3 Terms)
Model 096:  AIC = 663.4622 & BIC = 675.4960 (3 Terms)
Model 097:  AIC = 691.6121 & BIC = 703.6459 (3 Terms)
Model 098:  AIC = 610.5569 & BIC = 622.5907 (3 Terms)
Model 099:  AIC = 753.2032 & BIC = 765.2370 (3 Terms)
Model 100:  AIC = 708.5702 & BIC = 716.5927 (2 Terms)
Model 101:  AIC = 646.6925 & BIC = 654.7150 (2 Terms)
Model 102:  AIC = 700.0558 & BIC = 708.0783 (2 Terms)
Model 103:  AIC = 697.5921 & BIC = 705.6147 (2 Terms)
Model 104:  AIC = 704.5057 & BIC = 712.5282 (2 Terms)
Model 105:  AIC = 622.8196 & BIC = 630.8422 (2 Terms)
Model 106:  AIC = 862.2705 & BIC = 870.2930 (2 Terms)
Model 107:  AIC = 704.1059 & BIC = 712.1285 (2 Terms)
Model 108:  AIC = 848.2829 & BIC = 856.3054 (2 Terms)
Model 109:  AIC = 701.3768 & BIC = 709.3994 (2 Terms)
Model 110:  AIC = 863.8412 & BIC = 871.8637 (2 Terms)
Model 111:  AIC = 686.9972 & BIC = 695.0198 (2 Terms)
Model 112:  AIC = 976.0873 & BIC = 984.1098 (2 Terms)
Model 113:  AIC = 752.7273 & BIC = 760.7498 (2 Terms)
Model 114:  AIC = 1054.1848 & BIC = 1062.2073 (2 Terms)
Model 115:  AIC = 700.4043 & BIC = 708.4268 (2 Terms)
Model 116:  AIC = 707.9458 & BIC = 715.9683 (2 Terms)
Model 117:  AIC = 691.4227 & BIC = 699.4452 (2 Terms)
Model 118:  AIC = 751.4122 & BIC = 759.4347 (2 Terms)
Model 119:  AIC = 915.2317 & BIC = 923.2542 (2 Terms)
Model 120:  AIC = 758.0984 & BIC = 766.1210 (2 Terms)
Model 121:  AIC = 738.2662 & BIC = 742.2775 (1 Terms)
Model 122:  AIC = 861.8462 & BIC = 865.8574 (1 Terms)
Model 123:  AIC = 1109.4646 & BIC = 1113.4759 (1 Terms)
Model 124:  AIC = 727.5389 & BIC = 731.5502 (1 Terms)
Model 125:  AIC = 996.5779 & BIC = 1000.5891 (1 Terms)
Model 126:  AIC = 768.4575 & BIC = 772.4688 (1 Terms)
Model 127:  AIC = 1090.7113 & BIC = 1094.7225 (1 Terms)

*** BEST ERROR REDUCTION MODELS ***
Model 007:  AIC = 382.2329 & BIC = 406.3005 (6 Terms)

```

Listing 3 : Statistical models for the "Line Source" (base case)

```

*** ERROR REDUCTION MODELS ***
Model 001:  AIC = 480.2421 & BIC = 508.3210 (7 Terms)
Model 002:  AIC = 560.6119 & BIC = 584.6795 (6 Terms)
Model 003:  AIC = 496.0918 & BIC = 520.1594 (6 Terms)
Model 004:  AIC = 515.7065 & BIC = 539.7741 (6 Terms)
Model 005:  AIC = 482.1347 & BIC = 506.2023 (6 Terms)
Model 006:  AIC = 486.0717 & BIC = 510.1393 (6 Terms)
Model 007:  AIC = 492.5250 & BIC = 516.5926 (6 Terms)
Model 008:  AIC = 478.4108 & BIC = 502.4784 (6 Terms)
Model 009:  AIC = 565.9010 & BIC = 585.9574 (5 Terms)
Model 010:  AIC = 583.8352 & BIC = 603.8916 (5 Terms)
Model 011:  AIC = 560.0436 & BIC = 580.0999 (5 Terms)
Model 012:  AIC = 718.4606 & BIC = 738.5170 (5 Terms)

```

|            |       |          |         |          |           |
|------------|-------|----------|---------|----------|-----------|
| Model 013: | AIC = | 564.1466 | & BIC = | 584.2030 | (5 Terms) |
| Model 014: | AIC = | 560.8280 | & BIC = | 580.8844 | (5 Terms) |
| Model 015: | AIC = | 526.3957 | & BIC = | 546.4520 | (5 Terms) |
| Model 016: | AIC = | 581.9360 | & BIC = | 601.9924 | (5 Terms) |
| Model 017: | AIC = | 500.2958 | & BIC = | 520.3522 | (5 Terms) |
| Model 018: | AIC = | 506.0062 | & BIC = | 526.0626 | (5 Terms) |
| Model 019: | AIC = | 548.9225 | & BIC = | 568.9788 | (5 Terms) |
| Model 020: | AIC = | 516.4728 | & BIC = | 536.5292 | (5 Terms) |
| Model 021: | AIC = | 525.9726 | & BIC = | 546.0289 | (5 Terms) |
| Model 022: | AIC = | 523.8456 | & BIC = | 543.9019 | (5 Terms) |
| Model 023: | AIC = | 515.7351 | & BIC = | 535.7915 | (5 Terms) |
| Model 024: | AIC = | 487.5749 | & BIC = | 507.6313 | (5 Terms) |
| Model 025: | AIC = | 517.7705 | & BIC = | 537.8268 | (5 Terms) |
| Model 026: | AIC = | 485.6776 | & BIC = | 505.7339 | (5 Terms) |
| Model 027: | AIC = | 496.8794 | & BIC = | 516.9357 | (5 Terms) |
| Model 028: | AIC = | 484.6623 | & BIC = | 504.7186 | (5 Terms) |
| Model 029: | AIC = | 551.9587 | & BIC = | 572.0151 | (5 Terms) |
| Model 030: | AIC = | 586.3957 | & BIC = | 602.4408 | (4 Terms) |
| Model 031: | AIC = | 613.8148 | & BIC = | 629.8599 | (4 Terms) |
| Model 032: | AIC = | 582.5621 | & BIC = | 598.6072 | (4 Terms) |
| Model 033: | AIC = | 594.4882 | & BIC = | 610.5333 | (4 Terms) |
| Model 034: | AIC = | 718.0235 | & BIC = | 734.0686 | (4 Terms) |
| Model 035: | AIC = | 777.6872 | & BIC = | 793.7323 | (4 Terms) |
| Model 036: | AIC = | 536.0808 | & BIC = | 552.1258 | (4 Terms) |
| Model 037: | AIC = | 716.6368 | & BIC = | 732.6819 | (4 Terms) |
| Model 038: | AIC = | 581.5029 | & BIC = | 597.5480 | (4 Terms) |
| Model 039: | AIC = | 526.6675 | & BIC = | 542.7126 | (4 Terms) |
| Model 040: | AIC = | 571.1750 | & BIC = | 587.2201 | (4 Terms) |
| Model 041: | AIC = | 584.9829 | & BIC = | 601.0280 | (4 Terms) |
| Model 042: | AIC = | 532.9448 | & BIC = | 548.9899 | (4 Terms) |
| Model 043: | AIC = | 574.4002 | & BIC = | 590.4453 | (4 Terms) |
| Model 044: | AIC = | 763.1899 | & BIC = | 779.2349 | (4 Terms) |
| Model 045: | AIC = | 541.9903 | & BIC = | 558.0354 | (4 Terms) |
| Model 046: | AIC = | 717.7983 | & BIC = | 733.8434 | (4 Terms) |
| Model 047: | AIC = | 510.4146 | & BIC = | 526.4597 | (4 Terms) |
| Model 048: | AIC = | 533.9758 | & BIC = | 550.0208 | (4 Terms) |
| Model 049: | AIC = | 519.6370 | & BIC = | 535.6821 | (4 Terms) |
| Model 050: | AIC = | 572.3827 | & BIC = | 588.4278 | (4 Terms) |
| Model 051: | AIC = | 582.5060 | & BIC = | 598.5510 | (4 Terms) |
| Model 052: | AIC = | 550.1118 | & BIC = | 566.1569 | (4 Terms) |
| Model 053: | AIC = | 558.8609 | & BIC = | 574.9060 | (4 Terms) |
| Model 054: | AIC = | 737.7429 | & BIC = | 753.7879 | (4 Terms) |
| Model 055: | AIC = | 514.4740 | & BIC = | 530.5191 | (4 Terms) |
| Model 056: | AIC = | 718.5513 | & BIC = | 734.5963 | (4 Terms) |
| Model 057: | AIC = | 547.3428 | & BIC = | 563.3878 | (4 Terms) |
| Model 058: | AIC = | 526.0873 | & BIC = | 542.1324 | (4 Terms) |
| Model 059: | AIC = | 488.2187 | & BIC = | 504.2638 | (4 Terms) |
| Model 060: | AIC = | 569.6551 | & BIC = | 585.7002 | (4 Terms) |
| Model 061: | AIC = | 550.0599 | & BIC = | 566.1050 | (4 Terms) |
| Model 062: | AIC = | 550.9205 | & BIC = | 566.9656 | (4 Terms) |
| Model 063: | AIC = | 612.5479 | & BIC = | 628.5930 | (4 Terms) |
| Model 064: | AIC = | 552.3027 | & BIC = | 568.3478 | (4 Terms) |
| Model 065: | AIC = | 623.4304 | & BIC = | 635.4643 | (3 Terms) |
| Model 066: | AIC = | 775.9476 | & BIC = | 787.9814 | (3 Terms) |
| Model 067: | AIC = | 734.7450 | & BIC = | 746.7788 | (3 Terms) |
| Model 068: | AIC = | 775.6968 | & BIC = | 787.7306 | (3 Terms) |
| Model 069: | AIC = | 601.4104 | & BIC = | 613.4442 | (3 Terms) |

|            |                 |                   |           |
|------------|-----------------|-------------------|-----------|
| Model 070: | AIC = 592.4083  | & BIC = 604.4421  | (3 Terms) |
| Model 071: | AIC = 770.3294  | & BIC = 782.3632  | (3 Terms) |
| Model 072: | AIC = 591.0657  | & BIC = 603.0995  | (3 Terms) |
| Model 073: | AIC = 763.9131  | & BIC = 775.9469  | (3 Terms) |
| Model 074: | AIC = 716.5170  | & BIC = 728.5508  | (3 Terms) |
| Model 075: | AIC = 775.8328  | & BIC = 787.8666  | (3 Terms) |
| Model 076: | AIC = 540.0868  | & BIC = 552.1206  | (3 Terms) |
| Model 077: | AIC = 721.2484  | & BIC = 733.2822  | (3 Terms) |
| Model 078: | AIC = 761.9604  | & BIC = 773.9942  | (3 Terms) |
| Model 079: | AIC = 552.3054  | & BIC = 564.3392  | (3 Terms) |
| Model 080: | AIC = 595.2768  | & BIC = 607.3106  | (3 Terms) |
| Model 081: | AIC = 782.0989  | & BIC = 794.1327  | (3 Terms) |
| Model 082: | AIC = 580.5883  | & BIC = 592.6221  | (3 Terms) |
| Model 083: | AIC = 796.3904  | & BIC = 808.4242  | (3 Terms) |
| Model 084: | AIC = 716.6563  | & BIC = 728.6901  | (3 Terms) |
| Model 085: | AIC = 776.0825  | & BIC = 788.1163  | (3 Terms) |
| Model 086: | AIC = 557.3592  | & BIC = 569.3930  | (3 Terms) |
| Model 087: | AIC = 719.3387  | & BIC = 731.3725  | (3 Terms) |
| Model 088: | AIC = 791.7155  | & BIC = 803.7493  | (3 Terms) |
| Model 089: | AIC = 524.6716  | & BIC = 536.7054  | (3 Terms) |
| Model 090: | AIC = 571.0262  | & BIC = 583.0600  | (3 Terms) |
| Model 091: | AIC = 592.8115  | & BIC = 604.8453  | (3 Terms) |
| Model 092: | AIC = 549.3126  | & BIC = 561.3464  | (3 Terms) |
| Model 093: | AIC = 610.5513  | & BIC = 622.5851  | (3 Terms) |
| Model 094: | AIC = 881.0454  | & BIC = 893.0792  | (3 Terms) |
| Model 095: | AIC = 616.9590  | & BIC = 628.9928  | (3 Terms) |
| Model 096: | AIC = 717.3411  | & BIC = 729.3749  | (3 Terms) |
| Model 097: | AIC = 550.3268  | & BIC = 562.3606  | (3 Terms) |
| Model 098: | AIC = 559.6060  | & BIC = 571.6398  | (3 Terms) |
| Model 099: | AIC = 628.6530  | & BIC = 640.6869  | (3 Terms) |
| Model 100: | AIC = 784.6650  | & BIC = 792.6875  | (2 Terms) |
| Model 101: | AIC = 774.6424  | & BIC = 782.6650  | (2 Terms) |
| Model 102: | AIC = 775.0181  | & BIC = 783.0407  | (2 Terms) |
| Model 103: | AIC = 815.7513  | & BIC = 823.7738  | (2 Terms) |
| Model 104: | AIC = 776.3462  | & BIC = 784.3688  | (2 Terms) |
| Model 105: | AIC = 762.5123  | & BIC = 770.5348  | (2 Terms) |
| Model 106: | AIC = 795.8500  | & BIC = 803.8725  | (2 Terms) |
| Model 107: | AIC = 774.1385  | & BIC = 782.1610  | (2 Terms) |
| Model 108: | AIC = 790.5731  | & BIC = 798.5956  | (2 Terms) |
| Model 109: | AIC = 775.7453  | & BIC = 783.7678  | (2 Terms) |
| Model 110: | AIC = 804.6386  | & BIC = 812.6611  | (2 Terms) |
| Model 111: | AIC = 593.6120  | & BIC = 601.6345  | (2 Terms) |
| Model 112: | AIC = 1034.3253 | & BIC = 1042.3478 | (2 Terms) |
| Model 113: | AIC = 627.7191  | & BIC = 635.7416  | (2 Terms) |
| Model 114: | AIC = 1119.4241 | & BIC = 1127.4466 | (2 Terms) |
| Model 115: | AIC = 718.2423  | & BIC = 726.2648  | (2 Terms) |
| Model 116: | AIC = 774.7821  | & BIC = 782.8046  | (2 Terms) |
| Model 117: | AIC = 557.6296  | & BIC = 565.6521  | (2 Terms) |
| Model 118: | AIC = 719.5425  | & BIC = 727.5650  | (2 Terms) |
| Model 119: | AIC = 980.0107  | & BIC = 988.0332  | (2 Terms) |
| Model 120: | AIC = 626.9783  | & BIC = 635.0008  | (2 Terms) |
| Model 121: | AIC = 855.1810  | & BIC = 859.1923  | (1 Terms) |
| Model 122: | AIC = 825.2913  | & BIC = 829.3025  | (1 Terms) |
| Model 123: | AIC = 1179.9119 | & BIC = 1183.9231 | (1 Terms) |
| Model 124: | AIC = 776.1363  | & BIC = 780.1476  | (1 Terms) |
| Model 125: | AIC = 1056.5279 | & BIC = 1060.5392 | (1 Terms) |
| Model 126: | AIC = 774.3804  | & BIC = 778.3917  | (1 Terms) |

Model 127: AIC = 1164.4041 & BIC = 1168.4154 (1 Terms)

\*\*\* BEST ERROR REDUCTION MODELS \*\*\*

Model 008: AIC = 478.4108 & BIC = 502.4784 (6 Terms)

Listing 4 : Statistical models for the "Point Source" (base case)

\*\*\* ERROR REDUCTION MODELS \*\*\*

Model 001: AIC = 516.5162 & BIC = 544.5951 (7 Terms)  
 Model 002: AIC = 551.8963 & BIC = 575.9639 (6 Terms)  
 Model 003: AIC = 515.9237 & BIC = 539.9913 (6 Terms)  
 Model 004: AIC = 522.9692 & BIC = 547.0368 (6 Terms)  
 Model 005: AIC = 514.7844 & BIC = 538.8520 (6 Terms)  
 Model 006: AIC = 527.0333 & BIC = 551.1009 (6 Terms)  
 Model 007: AIC = 514.5781 & BIC = 538.6457 (6 Terms)  
 Model 008: AIC = 515.8843 & BIC = 539.9519 (6 Terms)  
 Model 009: AIC = 550.5805 & BIC = 570.6368 (5 Terms)  
 Model 010: AIC = 584.7050 & BIC = 604.7613 (5 Terms)  
 Model 011: AIC = 549.9804 & BIC = 570.0367 (5 Terms)  
 Model 012: AIC = 616.8468 & BIC = 636.9031 (5 Terms)  
 Model 013: AIC = 549.9063 & BIC = 569.9626 (5 Terms)  
 Model 014: AIC = 549.9839 & BIC = 570.0402 (5 Terms)  
 Model 015: AIC = 522.1990 & BIC = 542.2554 (5 Terms)  
 Model 016: AIC = 527.8178 & BIC = 547.8741 (5 Terms)  
 Model 017: AIC = 526.0988 & BIC = 546.1551 (5 Terms)  
 Model 018: AIC = 556.6633 & BIC = 576.7196 (5 Terms)  
 Model 019: AIC = 550.0185 & BIC = 570.0749 (5 Terms)  
 Model 020: AIC = 521.1899 & BIC = 541.2462 (5 Terms)  
 Model 021: AIC = 525.0389 & BIC = 545.0952 (5 Terms)  
 Model 022: AIC = 521.0206 & BIC = 541.0769 (5 Terms)  
 Model 023: AIC = 521.1768 & BIC = 541.2331 (5 Terms)  
 Model 024: AIC = 525.2030 & BIC = 545.2594 (5 Terms)  
 Model 025: AIC = 513.5629 & BIC = 533.6192 (5 Terms)  
 Model 026: AIC = 525.2375 & BIC = 545.2939 (5 Terms)  
 Model 027: AIC = 525.0636 & BIC = 545.1199 (5 Terms)  
 Model 028: AIC = 525.2001 & BIC = 545.2565 (5 Terms)  
 Model 029: AIC = 531.4730 & BIC = 551.5293 (5 Terms)  
 Model 030: AIC = 582.9480 & BIC = 598.9931 (4 Terms)  
 Model 031: AIC = 557.8958 & BIC = 573.9409 (4 Terms)  
 Model 032: AIC = 582.7095 & BIC = 598.7546 (4 Terms)  
 Model 033: AIC = 533.0149 & BIC = 549.0600 (4 Terms)  
 Model 034: AIC = 615.1222 & BIC = 631.1672 (4 Terms)  
 Model 035: AIC = 710.2246 & BIC = 726.2697 (4 Terms)  
 Model 036: AIC = 524.1019 & BIC = 540.1470 (4 Terms)  
 Model 037: AIC = 614.8677 & BIC = 630.9127 (4 Terms)  
 Model 038: AIC = 536.2373 & BIC = 552.2823 (4 Terms)  
 Model 039: AIC = 523.2077 & BIC = 539.2528 (4 Terms)  
 Model 040: AIC = 577.0988 & BIC = 593.1439 (4 Terms)  
 Model 041: AIC = 582.7133 & BIC = 598.7583 (4 Terms)  
 Model 042: AIC = 559.1296 & BIC = 575.1746 (4 Terms)  
 Model 043: AIC = 548.3828 & BIC = 564.4279 (4 Terms)  
 Model 044: AIC = 699.9415 & BIC = 715.9866 (4 Terms)  
 Model 045: AIC = 519.8256 & BIC = 535.8707 (4 Terms)  
 Model 046: AIC = 614.8487 & BIC = 630.8938 (4 Terms)  
 Model 047: AIC = 561.3878 & BIC = 577.4328 (4 Terms)  
 Model 048: AIC = 523.0687 & BIC = 539.1138 (4 Terms)

|            |       |          |         |          |           |
|------------|-------|----------|---------|----------|-----------|
| Model 049: | AIC = | 523.8225 | & BIC = | 539.8676 | (4 Terms) |
| Model 050: | AIC = | 552.9248 | & BIC = | 568.9698 | (4 Terms) |
| Model 051: | AIC = | 582.7480 | & BIC = | 598.7930 | (4 Terms) |
| Model 052: | AIC = | 552.6939 | & BIC = | 568.7389 | (4 Terms) |
| Model 053: | AIC = | 547.9858 | & BIC = | 564.0308 | (4 Terms) |
| Model 054: | AIC = | 593.0397 | & BIC = | 609.0847 | (4 Terms) |
| Model 055: | AIC = | 524.3754 | & BIC = | 540.4205 | (4 Terms) |
| Model 056: | AIC = | 615.2662 | & BIC = | 631.3113 | (4 Terms) |
| Model 057: | AIC = | 548.6869 | & BIC = | 564.7320 | (4 Terms) |
| Model 058: | AIC = | 523.2165 | & BIC = | 539.2616 | (4 Terms) |
| Model 059: | AIC = | 527.0500 | & BIC = | 543.0951 | (4 Terms) |
| Model 060: | AIC = | 548.9378 | & BIC = | 564.9829 | (4 Terms) |
| Model 061: | AIC = | 563.1517 | & BIC = | 579.1968 | (4 Terms) |
| Model 062: | AIC = | 530.3237 | & BIC = | 546.3687 | (4 Terms) |
| Model 063: | AIC = | 529.4731 | & BIC = | 545.5181 | (4 Terms) |
| Model 064: | AIC = | 529.7217 | & BIC = | 545.7667 | (4 Terms) |
| Model 065: | AIC = | 586.9887 | & BIC = | 599.0225 | (3 Terms) |
| Model 066: | AIC = | 708.2312 | & BIC = | 720.2650 | (3 Terms) |
| Model 067: | AIC = | 617.9610 | & BIC = | 629.9948 | (3 Terms) |
| Model 068: | AIC = | 708.3244 | & BIC = | 720.3582 | (3 Terms) |
| Model 069: | AIC = | 534.2373 | & BIC = | 546.2711 | (3 Terms) |
| Model 070: | AIC = | 600.6050 | & BIC = | 612.6388 | (3 Terms) |
| Model 071: | AIC = | 701.6617 | & BIC = | 713.6955 | (3 Terms) |
| Model 072: | AIC = | 581.0168 | & BIC = | 593.0506 | (3 Terms) |
| Model 073: | AIC = | 698.5437 | & BIC = | 710.5775 | (3 Terms) |
| Model 074: | AIC = | 626.9277 | & BIC = | 638.9615 | (3 Terms) |
| Model 075: | AIC = | 708.3516 | & BIC = | 720.3854 | (3 Terms) |
| Model 076: | AIC = | 559.3919 | & BIC = | 571.4257 | (3 Terms) |
| Model 077: | AIC = | 612.9811 | & BIC = | 625.0149 | (3 Terms) |
| Model 078: | AIC = | 698.6054 | & BIC = | 710.6392 | (3 Terms) |
| Model 079: | AIC = | 521.8286 | & BIC = | 533.8624 | (3 Terms) |
| Model 080: | AIC = | 589.0602 | & BIC = | 601.0940 | (3 Terms) |
| Model 081: | AIC = | 605.1685 | & BIC = | 617.2023 | (3 Terms) |
| Model 082: | AIC = | 581.2101 | & BIC = | 593.2439 | (3 Terms) |
| Model 083: | AIC = | 646.1754 | & BIC = | 658.2092 | (3 Terms) |
| Model 084: | AIC = | 613.4773 | & BIC = | 625.5111 | (3 Terms) |
| Model 085: | AIC = | 708.2249 | & BIC = | 720.2587 | (3 Terms) |
| Model 086: | AIC = | 551.4370 | & BIC = | 563.4708 | (3 Terms) |
| Model 087: | AIC = | 614.7086 | & BIC = | 626.7424 | (3 Terms) |
| Model 088: | AIC = | 616.3087 | & BIC = | 628.3425 | (3 Terms) |
| Model 089: | AIC = | 525.4738 | & BIC = | 537.5076 | (3 Terms) |
| Model 090: | AIC = | 577.0755 | & BIC = | 589.1093 | (3 Terms) |
| Model 091: | AIC = | 581.1069 | & BIC = | 593.1407 | (3 Terms) |
| Model 092: | AIC = | 561.2581 | & BIC = | 573.2919 | (3 Terms) |
| Model 093: | AIC = | 548.0945 | & BIC = | 560.1283 | (3 Terms) |
| Model 094: | AIC = | 736.4775 | & BIC = | 748.5113 | (3 Terms) |
| Model 095: | AIC = | 528.3875 | & BIC = | 540.4213 | (3 Terms) |
| Model 096: | AIC = | 623.2711 | & BIC = | 635.3049 | (3 Terms) |
| Model 097: | AIC = | 561.6428 | & BIC = | 573.6766 | (3 Terms) |
| Model 098: | AIC = | 530.0829 | & BIC = | 542.1167 | (3 Terms) |
| Model 099: | AIC = | 527.7309 | & BIC = | 539.7647 | (3 Terms) |
| Model 100: | AIC = | 708.1997 | & BIC = | 716.2222 | (2 Terms) |
| Model 101: | AIC = | 705.5771 | & BIC = | 713.5996 | (2 Terms) |
| Model 102: | AIC = | 711.1265 | & BIC = | 719.1491 | (2 Terms) |
| Model 103: | AIC = | 718.0927 | & BIC = | 726.1152 | (2 Terms) |
| Model 104: | AIC = | 706.3602 | & BIC = | 714.3827 | (2 Terms) |
| Model 105: | AIC = | 696.6394 | & BIC = | 704.6620 | (2 Terms) |



|            |       |          |         |          |           |
|------------|-------|----------|---------|----------|-----------|
| Model 106: | AIC = | 646.1805 | & BIC = | 654.2030 | (2 Terms) |
| Model 107: | AIC = | 706.3013 | & BIC = | 714.3238 | (2 Terms) |
| Model 108: | AIC = | 622.7828 | & BIC = | 630.8054 | (2 Terms) |
| Model 109: | AIC = | 706.8500 | & BIC = | 714.8726 | (2 Terms) |
| Model 110: | AIC = | 646.2357 | & BIC = | 654.2582 | (2 Terms) |
| Model 111: | AIC = | 598.6085 | & BIC = | 606.6310 | (2 Terms) |
| Model 112: | AIC = | 829.4327 | & BIC = | 837.4552 | (2 Terms) |
| Model 113: | AIC = | 579.2348 | & BIC = | 587.2573 | (2 Terms) |
| Model 114: | AIC = | 860.6207 | & BIC = | 868.6433 | (2 Terms) |
| Model 115: | AIC = | 636.4907 | & BIC = | 644.5133 | (2 Terms) |
| Model 116: | AIC = | 709.6320 | & BIC = | 717.6546 | (2 Terms) |
| Model 117: | AIC = | 560.5322 | & BIC = | 568.5547 | (2 Terms) |
| Model 118: | AIC = | 623.5570 | & BIC = | 631.5795 | (2 Terms) |
| Model 119: | AIC = | 791.1095 | & BIC = | 799.1321 | (2 Terms) |
| Model 120: | AIC = | 528.1109 | & BIC = | 536.1335 | (2 Terms) |
| Model 121: | AIC = | 760.9363 | & BIC = | 764.9476 | (1 Terms) |
| Model 122: | AIC = | 709.9145 | & BIC = | 713.9258 | (1 Terms) |
| Model 123: | AIC = | 898.2527 | & BIC = | 902.2639 | (1 Terms) |
| Model 124: | AIC = | 713.2731 | & BIC = | 717.2844 | (1 Terms) |
| Model 125: | AIC = | 861.0349 | & BIC = | 865.0461 | (1 Terms) |
| Model 126: | AIC = | 708.2118 | & BIC = | 712.2231 | (1 Terms) |
| Model 127: | AIC = | 890.1085 | & BIC = | 894.1198 | (1 Terms) |

\*\*\* BEST ERROR REDUCTION MODELS \*\*\*

|            |       |          |         |          |           |
|------------|-------|----------|---------|----------|-----------|
| Model 025: | AIC = | 513.5629 | & BIC = | 533.6192 | (5 Terms) |
|------------|-------|----------|---------|----------|-----------|
